# Supplementary material for: A novel micelleplex for tumour-targeted delivery of CRISPR-Cas9 against KRAS-mutated lung cancer
Source: Royal Society of Chemistry journal article supplement (doi:10.1039/d4nr03471f), 2025-01-01
Supplement: d4nr03471f1.pdf [file d4nr03471f1.pdf]

## A Novel Micelleplex for Tumour-Targeted Delivery of CRISPR-Cas9 against KRAS-Mutated Lung Cancer

Siyu Chen,<sup>a</sup> Mariem Triki,<sup>a</sup> Simone Pinto Carneiro,<sup>a</sup> and Olivia Monika Merkel<sup>\*a</sup>  
<sup>a</sup> Ludwig-Maximilians-University, Department of Pharmacy, Pharmaceutical Technology and Biopharmaceutics, Butenandtstraße 5-13, Munich, 81377, Germany

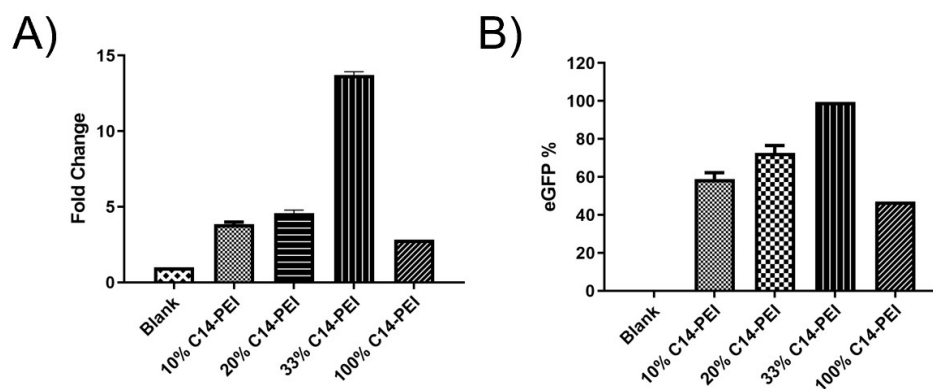

**Figure S1. eGFP mRNA expression with C14-PEI at different modification level in A549 cells. A)** Median eGFP fluorescence intensity after transfection 24h, results are normalised fold change; **B)** the percentage of eGFP positive cells.

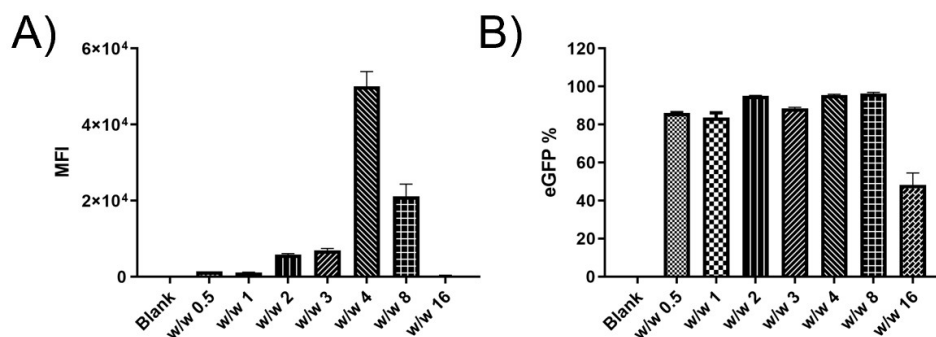

**Figure S2. eGFP mRNA expression with 33% C14-PEI at different mass ratios in A549 cells. A)** Median eGFP fluorescence intensity after transfection 24h; **B)** the percentage of eGFP positive cells.

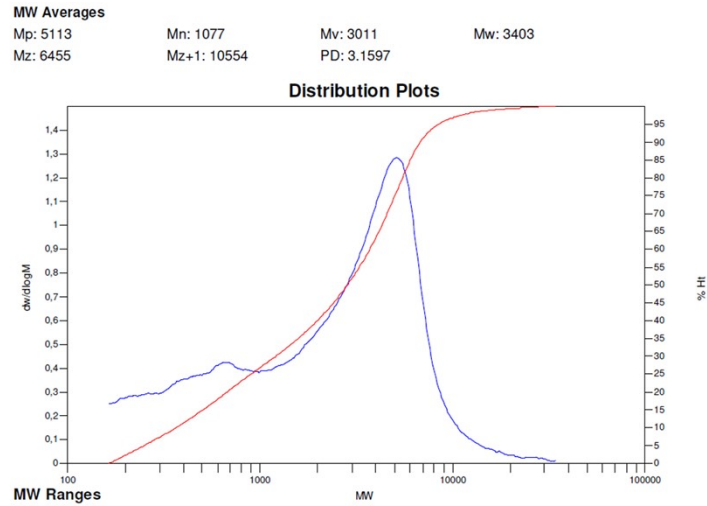

Figure S3. GPC analysis of 33% C14-PEI before purification.

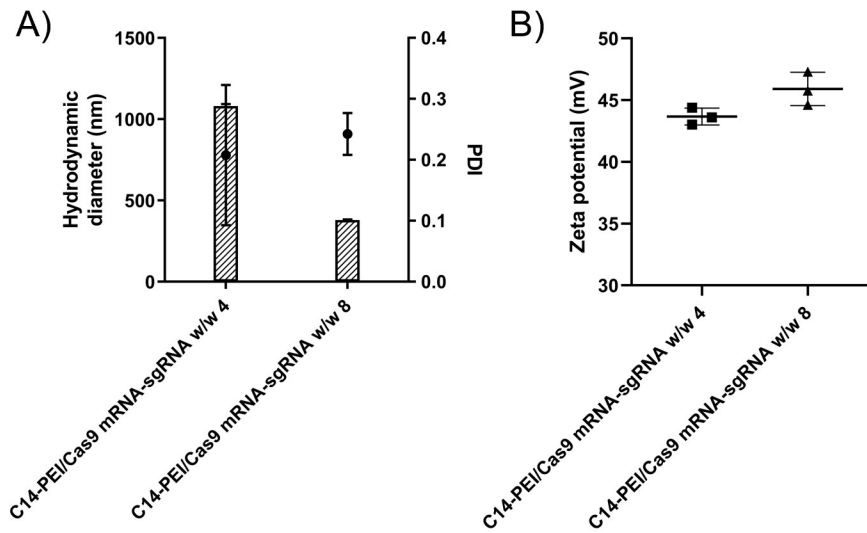

Figure S4. Characterization of C14-PEI micelleplexes co-loaded with Cas9 mRNA and sgRNA. **A)** the hydrodynamic diameter (bars) and polydispersity index (PDI, dots) of micelleplexes (n=3); **B)** the zeta potential of micelleplexes (n=3).
